# Supplementary material for: Atomic Arrangements of Graphene-like ZnO
Source: MDPI journal article supplement (doi:10.3390/nano11071833), 2021-07-14
Supplement: s1 [file s1]

# Atomic Arrangements of Graphene-Like ZnO

Jong Chan Yoon <sup>1,2</sup>, Zonghoon Lee <sup>1,2</sup> and Gyeong Hee Ryu <sup>3,\*</sup>

<sup>1</sup> Department of Materials Science and Engineering, Ulsan National Institute of Science and Technology (UNIST), Ulsan 44919, Korea; yjc1526@unist.ac.kr (J.C.Y.); zhlee@unist.ac.kr (Z.L.)

<sup>2</sup> Center for Multidimensional Carbon Materials, Institute for Basic Science (IBS), Ulsan 44919, Korea

<sup>3</sup> School of Materials Science and Engineering, Gyeongsang National University, Jinju 52828, Korea

\* Correspondence: gh.ryu@gnu.ac.kr

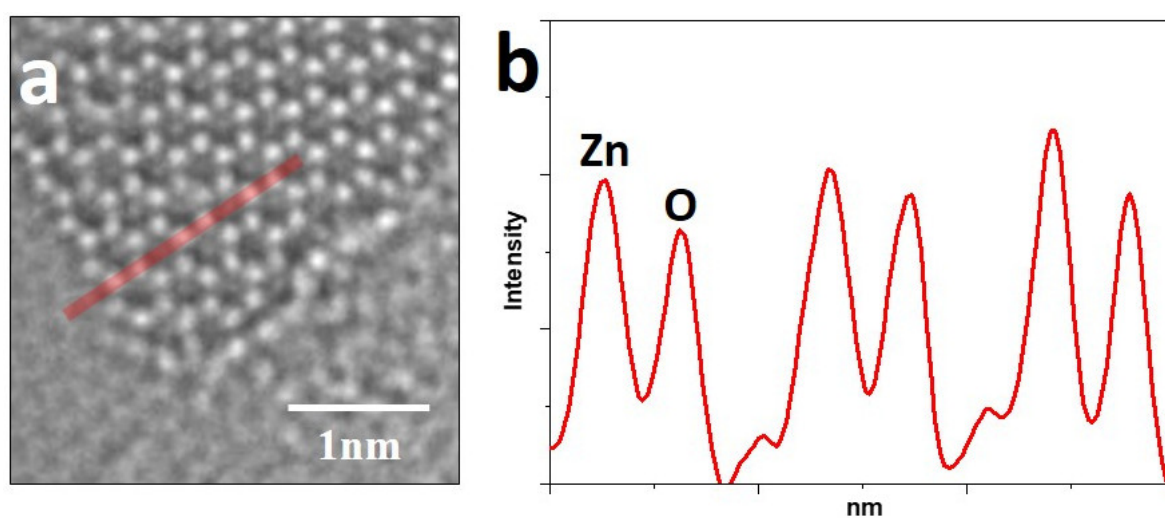

**Figure S1.** (a) Raw image of Figure 3(e). (b) Intensity line profiles acquired from the red line in (a). This indicates that the ZnO flake has O-terminated ZZ configuration.

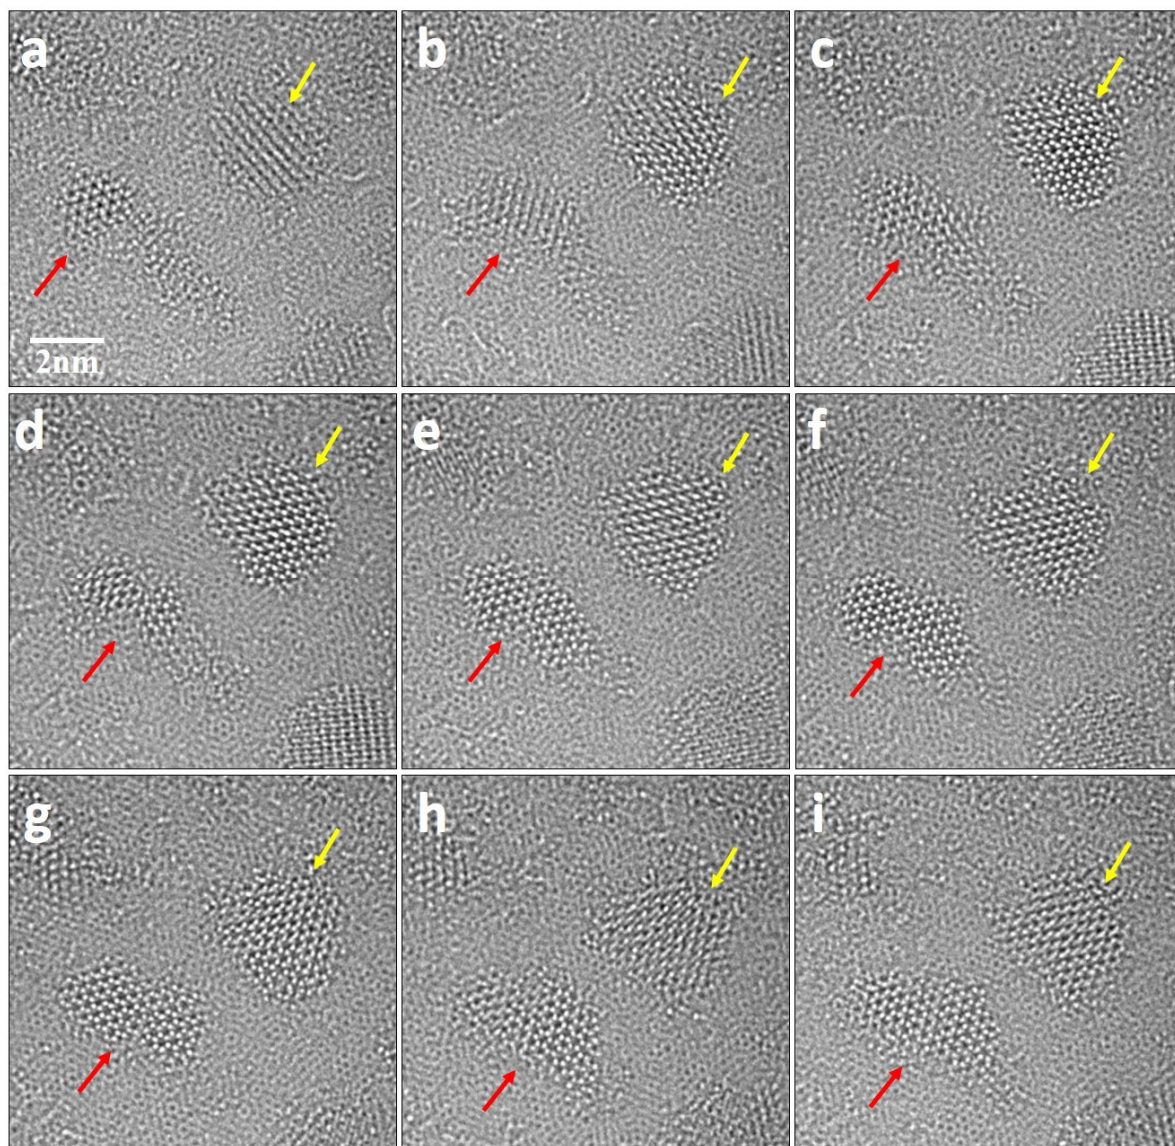

**Figure S2.** Atomic g-ZnO flakes on the graphene. (a–i) AC-TEM images showing the flakes atomically driven under electron beam irradiation.

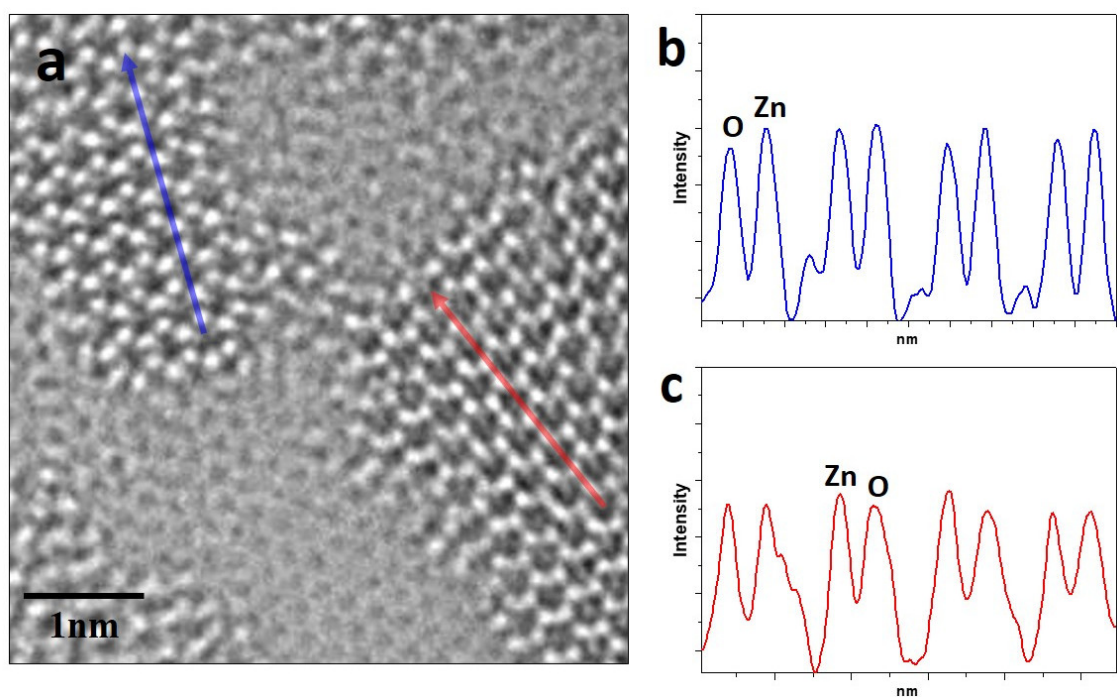

**Figure S3.** (a) Raw image of Figure 5(a). (b) and (c) Intensity line profiles acquired from blue and red arrows in (a).



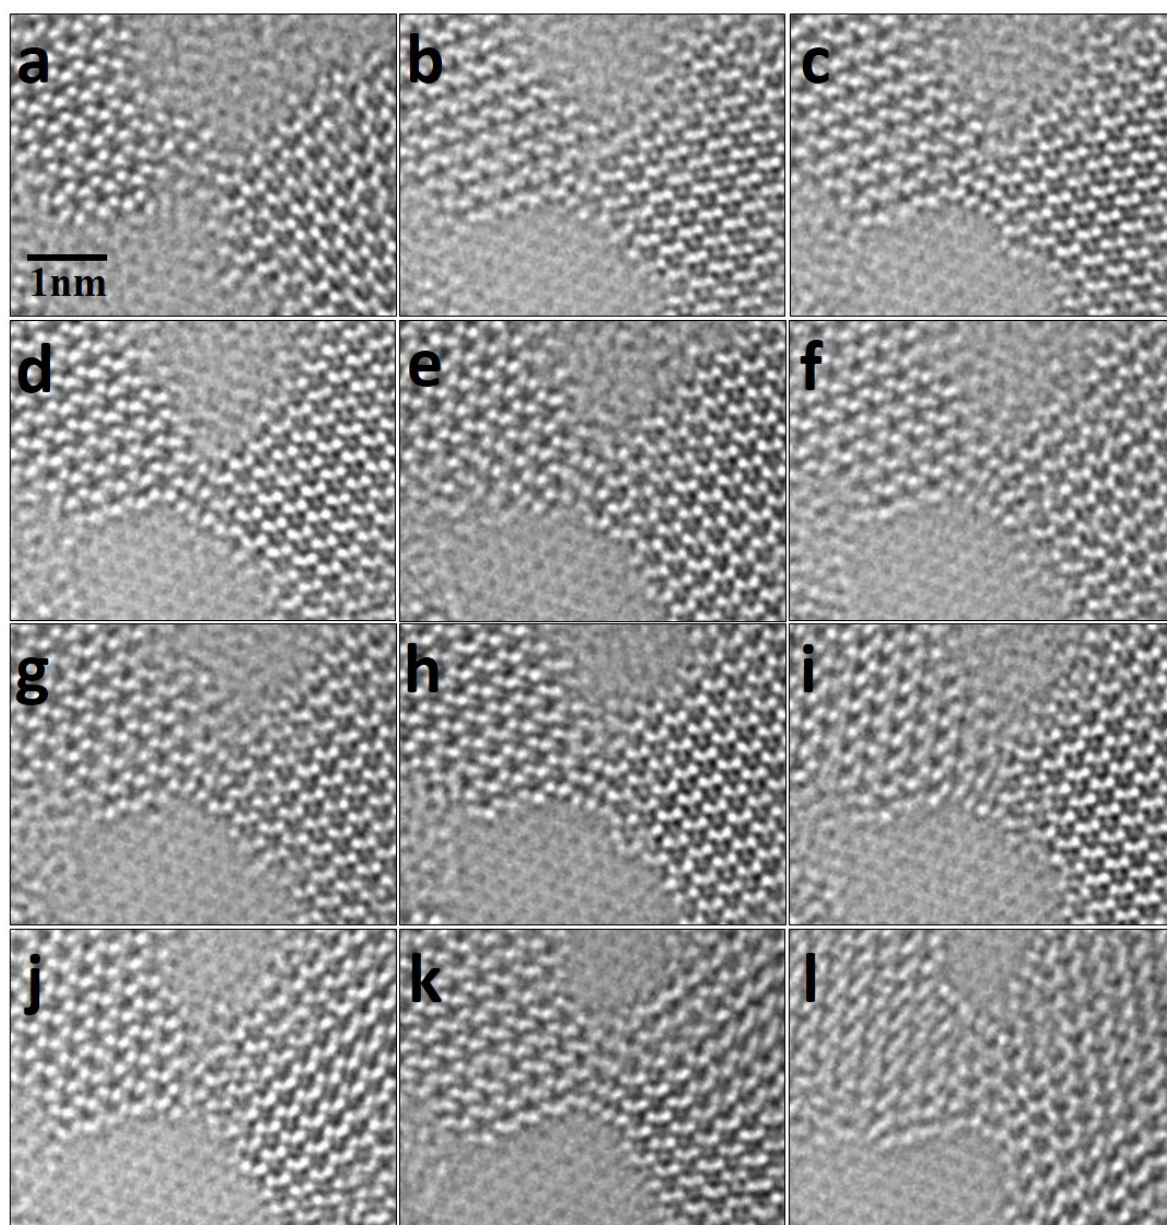

**Figure S4.** AC-TEM images showing the full processes of the merging between the g-ZnO flakes. .
